# Supplementary material for: Improved Treatment Outcome Following the Use of a Wound Dressings in Cutaneous Leishmaniasis Lesions
Source: MDPI journal article supplement (doi:10.3390/pathogens13050416), 2024-05-16
Supplement: s1 [file s1]

**Supplementary Table S1. Per-protocol analysis of therapeutic response at D30, D60 and D90.**

| Response to therapy,<br>n/N (%)     | BNC+MA<br>(N=23) | PL+MA (N=20) | MA (N=23)     | BNC+MA vs<br>PL+MA | BNC+ MA<br>vs MA    | PL+ MA<br>vs MA     |
|-------------------------------------|------------------|--------------|---------------|--------------------|---------------------|---------------------|
| Cure at D30                         | 3/23 (13%)       | 3/20 (15%)   | 0/23 (0%)     | ns <sup>§</sup>    | ns <sup>§</sup>     | ns <sup>§</sup>     |
| Cure at D60                         | 11/23 (47,8%)    | 10/20 (50%)  | 7/23 (30.4%)  | ns <sup>§</sup>    | ns <sup>§</sup>     | ns <sup>§</sup>     |
| Cure at D90                         | 17/23 (73,9%)    | 12/20 (60%)  | 10/23 (43.5%) | ns <sup>§</sup>    |                     | ns <sup>§</sup>     |
| Rescue therapy                      | 6/23 (26%)       | 8/20 (40%)   | 13/23 (56.5%) | ns <sup>§</sup>    | 0.0361 <sup>§</sup> | ns <sup>§</sup>     |
| Time-to-heal, days<br>(median, IQR) | 66.0 (38.0-110)  | 53(34.5-116) | 105 (60-150)  | ns <sup>¶</sup>    | 0.0185 <sup>¶</sup> | 0.0205 <sup>¶</sup> |

Abbreviation: IQR, interquartile range; ns, not significant.

§ Pearson's chi-squared test

¶ Mann-Whitney test
