# Supplementary figures and images for: Improved Treatment Outcome Following the Use of a Wound Dressings in Cutaneous Leishmaniasis Lesions
Source: MDPI journal article supplement (doi:10.3390/pathogens13050416), 2024-05-16

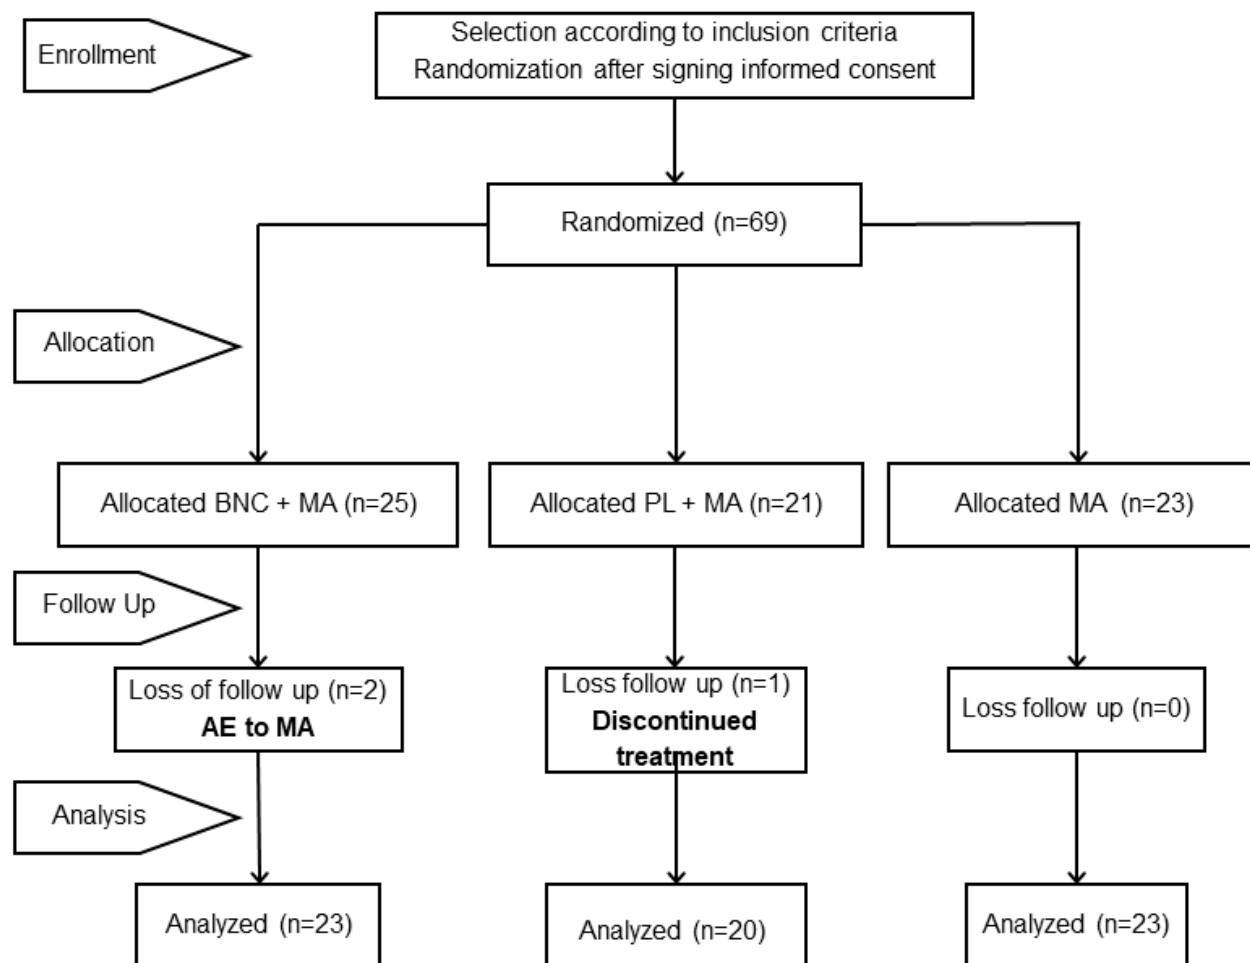

**Supplemental Figure S1.** Study flowchart.

Supplement: s1 [file s1]
